# Supplementary material
Source: ML conference proceedings conference paper supplement (https://openreview.net/forum?id=SfMArLi9e9)
Supplement: supplementary_material [file attachment]

CHOD

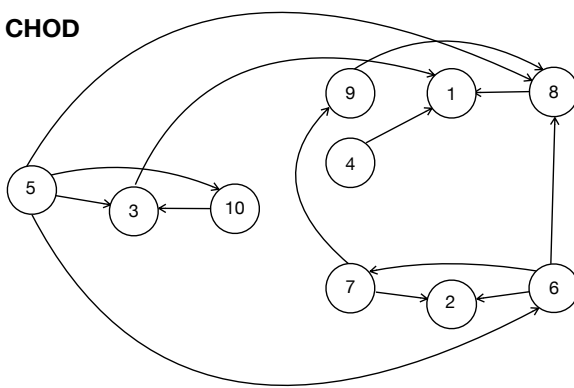

HUANG2020

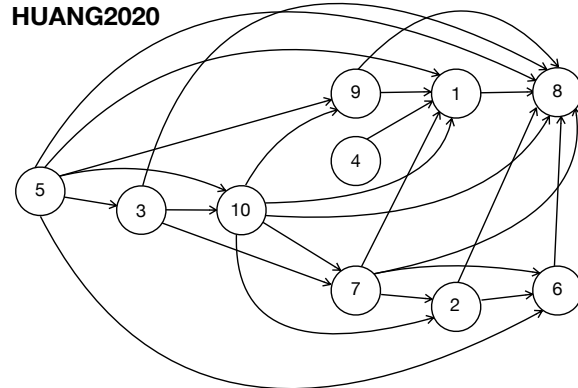

1

Cheung Kong

2

Wharf

3

HSBC

4

HK Electric

5

Hang Seng Bank

6

Henderson Land

7

Sun Hung Kai

8

Swire Group

9

Cathay Pacific

10

BoC Hong Kong
