# Supplementary material
Source: ML conference proceedings conference paper supplement (https://openreview.net/forum?id=SfMArLi9e9)
Supplement: supplementary_material [file attachment]

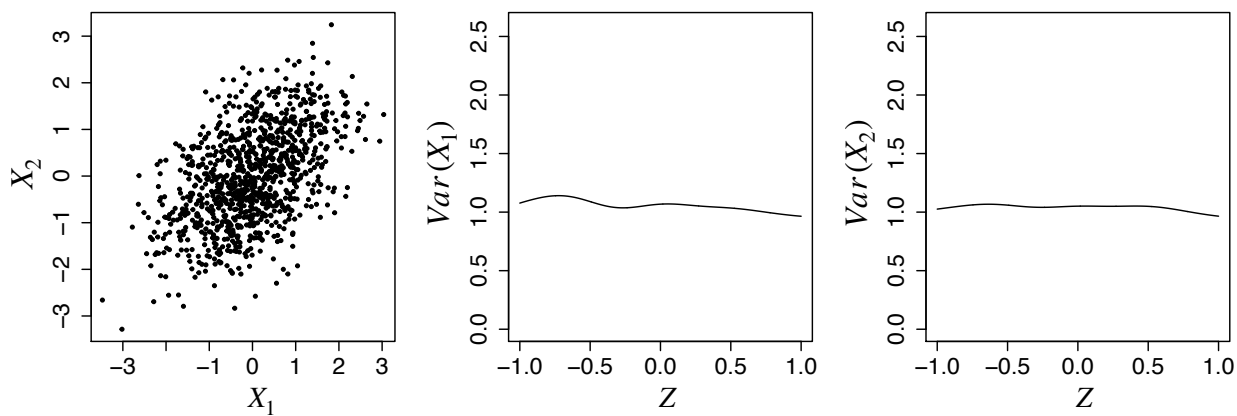

(a)  $x_1 \nrightarrow x_2$  and  $x_2 \nrightarrow x_1$

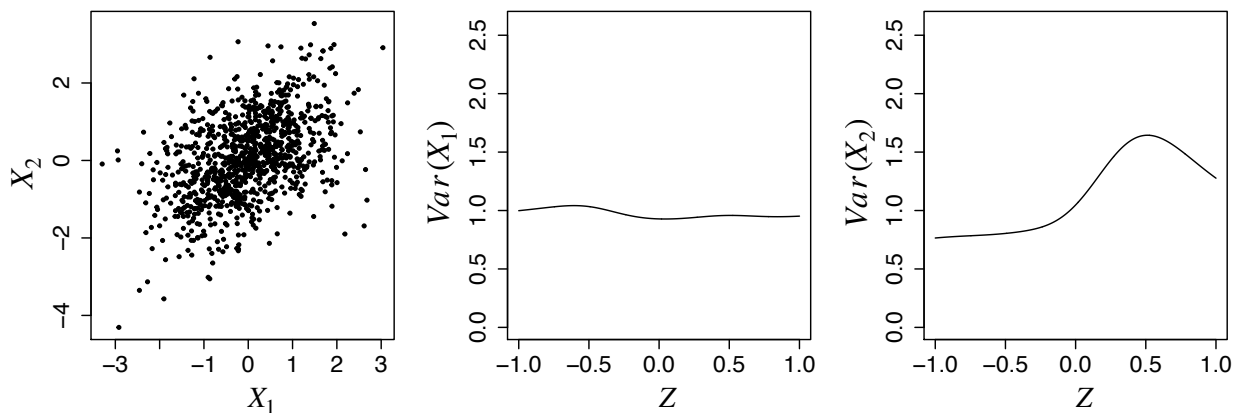

(b)  $x_1 \rightarrow x_2$  and  $x_2 \nrightarrow x_1$

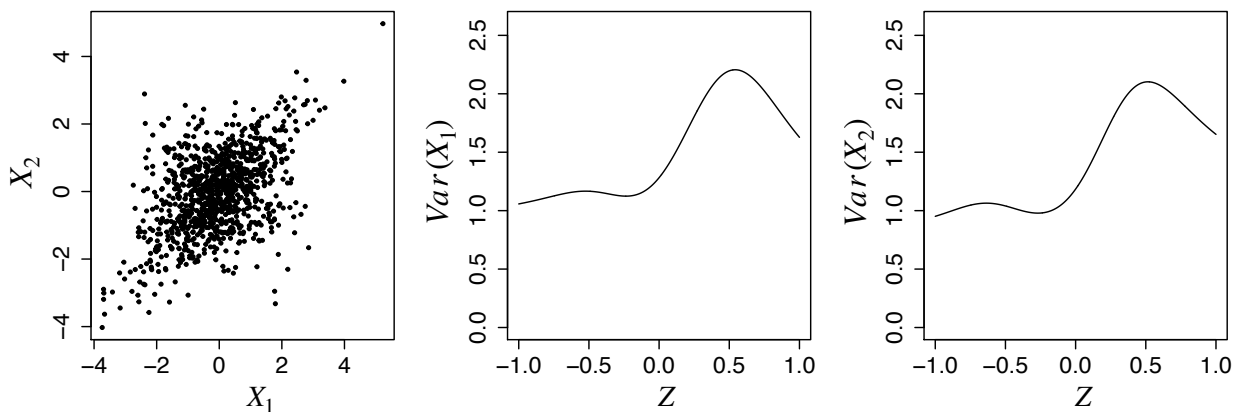

(c)  $x_1 \rightarrow x_2$  and  $x_2 \rightarrow x_1$
