# Supplementary material
Source: ML conference proceedings conference paper supplement (https://openreview.net/forum?id=SfMArLi9e9)
Supplement: supplementary_material [file attachment]

|   |                                     |    |                                        |
|---|-------------------------------------|----|----------------------------------------|
| 1 | Cheung Kong Holdings                | 6  | Henderson Land Development Co. Limited |
| 2 | Wharf (Holdings) Limited            | 7  | Sun Hung Kai Properties Limited        |
| 3 | HSBC Holdings plc                   | 8  | Swire Group                            |
| 4 | Hong Kong Electric Holdings Limited | 9  | Cathay Pacific Airways Ltd             |
| 5 | Hang Seng Bank Ltd                  | 10 | Bank of China Hong Kong (Holdings) Ltd |
